# Supplementary material
Source: HighWire-hosted journal article supplement (http://ebm.bmjjournals.com/highwire/filestream/142115/field_highwire_adjunct_files/0/ebmed-2012-100608supp_appendices.pdf)
Supplement: ebmed-2012-100608supp_appendices.pdf [file ebmed-2012-100608supp_appendices.pdf]

# Appendix 1: Protocol

---

Technology Assessment Report commissioned by the NETSCC HTA Programme

HTA 09/145

April 2011

**1. Title: The psychological consequences of false positive mammograms**

**2. Tar team: PenTAG, University of Exeter**

Project Lead: Mary Bond  
Research Fellow in HTA  
PenTAG  
Peninsula Medical School  
Veysey Building  
Salmon Pool Lane  
Exeter, EX2 4SG

Telephone: 01392 726077

Fax: 01392 421009

Email: [mary.bond@pms.ac.uk](mailto:mary.bond@pms.ac.uk)

**3. Plain English Summary**

In the UK women aged 50 to 70 years old are invited to come for mammography screening every three years. About 5% of these are recalled for further investigation. After follow-up it is found that about 82% of recalled women had nothing wrong with them (false-positives). However, the experience of being unnecessarily recalled can be distressing, not just in the short-term but may lead to enduring anxiety and affect attendance at future routine mammography screening. The purpose of this systematic review is to find out what the research evidence is for medium and long-term effects of having a false-positive mammogram on mental health and behaviour, whether some groups of women are more likely to be adversely affected than others and if there are ways of reducing the negative effects of being recalled when you are in fact well.

#### **4. Decision problem**

The purpose of this technology assessment is to conduct a systematic review, to identify the psychological and behavioural consequences following false-positive screening mammogram results that affect women and any evidence for the effectiveness of interventions designed to reduce these. In particular we will be looking at whether the psychological and behavioural consequences or the effectiveness of specific interventions differ in different groups of women.

This research is necessary because of the large number of false-positive results that come from routine mammography screening. In the UK women aged 50-70 years, on population registers, are invited for mammography every three years through the NHS Breast Screening Programme (NHSBSP). Around two million women were screened by the NHSBSP in 2007/8 and of these 95,006 (5%) were recalled for further investigation; 16,735 cancers were detected leaving 78,271(82%) false-positive recalls.<sup>1</sup>

Quantitative observational studies looking at the psychological and behavioural consequences of false-positive mammograms show conflicting results. Some studies indicate that, whilst women show increased distress between receiving the information about the need for a follow-up appointment and receiving the all-clear, in the longer term their anxieties about breast cancer and mammography are not increased.<sup>2-4</sup> Other studies report that there are long-term adverse psychological consequences to receiving a false-positive mammogram.<sup>5-8</sup> The outcomes of studies looking at whether having false-positive results affects future attendance at breast screening appointments is similarly conflicted.<sup>7;9-11</sup>

A quantitative systematic review in 2007 by Brewer and colleagues found that the impact of a false-positive mammogram on subsequent screening attendance varied with nationality; although the reasons for this were unclear. They also reported a varying impact on long-term psychological distress, anxiety and depression, and other behaviours such as frequency of breast self-examination.<sup>12</sup> However, their review did not report the reasons for this variation in response. Furthermore, Brewer and colleague's review found no statistically sound studies that investigated whether anxiety over a false-positive mammogram directly affects whether women return for routine screening or increase breast self-examination. There was little evidence about the effects on quality of life or trust of healthcare services and no evidence about whether women who felt anxious after a false-positive screening result replaced

routine screening attendance with breast self-examination.<sup>12</sup> We also do not know what meanings women attribute to a false-positive mammogram or how these may determine their behaviour when invited for further routine mammogram screening as qualitative evidence is lacking.

Therefore, there is uncertainty about the psychological impact of false-positive mammograms on women. We do not know what the mediators are of negative psychological and behavioural outcomes which may affect attendance at future mammography screening. There is a need to answer these questions to identify and evaluate studies of interventions to treat the effect of false-positive results, and identify whether these effects differ in women from different backgrounds. The answers will have important policy implications for the NHS in the provision of breast cancer screening services.

The questions that this systematic review will answer are:

1. What evidence is there for medium or long-term adverse psychological consequences of false-positive screening mammograms?

- 1.1. Do the types of psychological consequences differ between different groups of women?

2. Are there interventions that reduce adverse psychological consequences?

For question one the population will be women who have received a false-positive result from routine mammogram screening in the UK and invited for further assessment. Where studies include a comparator this will be women who had a routine screening mammogram but who had a normal mammogram and were not invited for further assessment. A range of outcomes, including qualitative, will be considered that report psychological and behavioural measures over the medium and long-term. Where data permit, sub-group analyses will be conducted of different groups of women (including socio-economic status and ethnic group).

For question two the population and the outcomes will be the same as question one. The interventions will be those delivered to individuals to address the adverse psychological consequences of a false-positive mammogram result, including attendance at future routine breast screening. Where there are comparators this will be an absence of an individualized intervention in the same population. Where data

permit, sub-group analyses will be conducted of different groups of women (including socio-economic status and ethnic group).

It is intended that this should be a wide systematic review considering a range of study types including uncontrolled studies and qualitative research but excluding individual case studies. Recommendations will be made for future primary research.

## 5. Methods for selection of evidence of clinical effectiveness

A systematic review will be conducted using the principles of the NHS Centre for Reviews and Dissemination<sup>13</sup> including those for non-randomized and qualitative studies.<sup>14</sup>

### 5.1. Inclusion criteria

| Question | Criteria            | Specification                                                                                                                                        | Notes                                                                                                                                                     |
|----------|---------------------|------------------------------------------------------------------------------------------------------------------------------------------------------|-----------------------------------------------------------------------------------------------------------------------------------------------------------|
| 1 and 2  | Population          | Women who have received a false-positive result from routine mammogram screening in the UK and have been invited for further assessment              | Where data permit we will look at sub groups including socio-economic status and ethnic group                                                             |
| 2        | Intervention        | Those interventions delivered to individuals to address the adverse psychological and behavioural consequences of a false-positive mammogram result. | These are individual interventions not group ones                                                                                                         |
| 2        | Comparator          | An absence of an individual intervention in the same population                                                                                      |                                                                                                                                                           |
| 1 and 2  | Outcomes            | Psychological and behavioural outcomes and those from qualitative studies                                                                            | Including subsequent attendance at routine mammography screening and quality of life                                                                      |
| 1 and 2  | Setting             | UK                                                                                                                                                   | Secondary care                                                                                                                                            |
| 1 and 2  | Study design        | Systematic reviews, randomized, non-randomized, observational and qualitative studies                                                                | We will not consider individual case studies                                                                                                              |
| 1 and 2  | Length of follow-up | At least one month from the 'all clear'                                                                                                              | Measured over the medium to long-term. i.e. not the immediate response to receiving a false-positive result                                               |
| 1 and 2  | Language            | English language only                                                                                                                                | Non English language papers will be included in the searches and screened, so that the number of potentially includable foreign language papers is known. |

### 5.2. Exclusion criteria

The following types of studies will be excluded: narrative reviews, editorials, opinion pieces, non English language papers, individual case studies, and studies only reported as posters or by abstract where there is insufficient information to assess the quality of the study.

### **5.3. Search strategy**

Refer to Appendix 1 for the draft search strategy for MEDLINE.

The search strategy will comprise the following main elements:

- Searching of electronic bibliographic databases
- Internet searches
- Scrutiny of references of included studies
- Contacting experts in the field

Databases will include:

MEDLINE, EMBASE, Cochrane Library, Psychlit, Cinahl Ebsco, Web of Science, Science Citation Index Expanded, Conference Proceedings Citation Index, Sociological Abstracts, Applied Social Sciences Index, Sociological Abstracts, Applied Social Sciences Index and International Bibliography of the Social Sciences.

### **5.4. Study selection**

Based on the above inclusion/exclusion criteria, papers will be selected for review from the titles and abstracts generated by the search strategy. This will be done independently by two reviewers; discrepancies will be resolved by discussion, with the involvement of a third reviewer if necessary. Although non English language papers will not be included in the systematic review due to resource limitations, they will be identified and any that meet the other inclusion criteria will be recorded with their language noted as the reason for their exclusion. Retrieved papers will again be reviewed and selected against the inclusion criteria by the same independent process.

### **5.5. Data extraction**

Data will be extracted from included studies by one reviewer using a standardised data extraction form and checked by another reviewer. Authors of studies will be contacted to provide missing information, as necessary.

### **5.6. Quality assessment**

Quantitative studies will be assessed for internal and external validity according to criteria suggested by the updated NHS CRD Report No.4, according to study type.<sup>13;15</sup>

Qualitative studies will have their quality assessed using a standard assessment tool, e.g. Mays and Pope 1995<sup>16</sup> and Popay and colleagues 1998<sup>17</sup>, a number of these will be piloted to assess their suitability for the task.

## **6. Methods for analysis and synthesis of evidence of clinical effectiveness**

### **6.1. Quantitative analysis and synthesis**

Studies were assessed for internal and external validity according to criteria suggested by the updated NHS CRD Report No.4, according to study type.<sup>13;15</sup> The quality of systematic reviews was evaluated using the PRISMA statement,<sup>18</sup>. Individual RCTs were appraised with the CONSORT statement<sup>19</sup> and individual observational studies with STROBE guidelines.<sup>20</sup>

### **6.2. Qualitative analysis and synthesis**

These studies will be analysed using meta-ethnography<sup>21-23</sup> supported by Atlas.ti6 software. Here the included studies' results are translated into one another, whilst preserving their original meaning, with an inductive and interpretive approach to allow comparison between them. Authors' interpretation of the primary study findings become the data, which are translated across studies by the reviewers to produce a synthesis of meaning allowing the production of higher order concepts.

### **6.3. Combined synthesis of quantitative and qualitative evidence**

The results of the quantitative and qualitative analyses will undergo narrative synthesis to construct an explanatory framework.<sup>24;25</sup> In this method both types of data analysis undergo a further narrative synthesis of their combined data through a process of developing an explanatory theory, undertaking a preliminary synthesis, looking at the relationships between and within studies and evaluating the robustness of the synthesis.

## 7. Expertise in this TAR team

### 7.1. People

| Name             | Institution                         | Expertise                                               |
|------------------|-------------------------------------|---------------------------------------------------------|
| Mrs Mary Bond    | PenTAG, University of Exeter        | Systematic reviewing, psychology and project management |
| Dr Toby Pavey    | PenTAG, University of Exeter        | Systematic reviewing                                    |
| Mrs Karen Welch  | Karen Welch Information Consultancy | Information Specialist                                  |
| Mr Chris Cooper  | PenTAG, University of Exeter        | Information Specialist                                  |
| Dr Ruth Garside  | PenTAG, University of Exeter        | Qualitative evidence synthesis                          |
| Prof. Chris Hyde | PenTAG, University of Exeter        | Diagnostics and public health                           |

In addition to the research team, we will be receiving expert clinical advice from Dr Russell Davies Consultant Breast Radiologist (Royal Devon and Exeter Foundation Trust), Gillian Gray (Breast Care nurse Royal Devon and Exeter Foundation Trust), Dr Jim Steel Consultant Breast Radiologist and Prof Carl Roobottom, Consultant Radiologist (both at Derriford Hospital, Plymouth), Jenny Hewison a Professor of the Psychology of Healthcare, from the University of Leeds. We have two patient representatives, Kate Blackmore and Sue Milward who have both had experience of having a false-positive mammogram to advise us on the patient perspective.

### 7.2. TAR centre – PenTAG

This project is being conducted by The Peninsula Technology Assessment Group (PenTAG), which is part of the Institute of Health Service Research at the Peninsula Medical School, University of Exeter. PenTAG was established in 2000 and carries out independent Health Technology Assessments for the UK HTA Programme and other local and national decision-makers including NICE. The group is multi-disciplinary and draws on individuals' backgrounds in public health, health services research, computing and decision analysis, systematic reviewing, psychology, statistics and health economics. The Institute of Health Service Research is made up of discrete but methodologically related research groups, among which Health Technology Assessment is a strong and recurring theme.

### 7.3. Contributions of team members

| Name         | Job title                                            | Contribution                                                                                                          |
|--------------|------------------------------------------------------|-----------------------------------------------------------------------------------------------------------------------|
| Mary Bond    | Research Fellow in Health Technology Assessment      | Providing project management. Writing the protocol. Conducting the systematic review. Writing and editing the report. |
| Toby Pavey   | Research Fellow in Health Technology Assessment      | Second reviewing the titles, abstracts and papers for the systematic review.                                          |
| Karen Welch  | Information Specialist                               | Writing and running the search strategies for the systematic review                                                   |
| Chris Cooper | Information Specialist                               | Writing and running the search strategies for the systematic review                                                   |
| Ruth Garside | Senior Research Fellow                               | Overseeing qualitative evidence synthesis                                                                             |
| Chris Hyde   | Professor of Public Health and Clinical Epidemiology | Director of the project and guarantor of the report. Contributing to editing the report.                              |

### 8. Competing interests of authors

None.

### 9. Timetable and project milestones

| Milestones       | November | December | January | February | March | April | May | June | July | August | September | October |
|------------------|----------|----------|---------|----------|-------|-------|-----|------|------|--------|-----------|---------|
| Conduct searches | ■        |          |         |          |       |       |     |      |      |        |           |         |
| Select studies   |          | ■        | ■       |          |       |       |     |      |      |        |           |         |
| Analysis         |          |          |         | ■        | ■     | ■     | ■   | ■    | ■    | ■      |           |         |
| Writing up       |          |          |         |          |       | ■     | ■   | ■    | ■    | ■      | ■         | ■       |



## 10. Reference List

- (1) NHS Breast Cancer Screening Programme. Breast Screening Results from the NHSBSP 2007/2008. <http://www.cancerscreening.nhs.uk/breastscreen/statistics.html> [ 2008 [cited 2010 July 20]; Available from: URL:<http://www.cancerscreening.nhs.uk/breastscreen/statistics.html>
- (2) Lampic C, Thurfjell E, Bergh J, Sjoden P-O. Short- and long-term anxiety and depression in women recalled after breast cancer screening. *EUR J CANCER* 2001; 37(4):463-469.
- (3) Scaf-Klomp W, Sanderman R, van de Wiel HB, Otter R, van den Heuvel WJ. Distressed or relieved? Psychological side effects of breast cancer screening in The Netherlands. *J Epidemiol Community Health* 1997; 51(6):705-710.
- (4) Sutton S, Saidi G, Bickler G, Hunter J. Does routine screening for breast cancer raise anxiety? Results from a three wave prospective study in England. *Journal of epidemiology and community health* 1995; 49:413-418.
- (5) Aro AR, Pilvikki Absetz S, van Elderen TM, van der Ploeg E, van der Kamp LJT. False-positive findings in mammography screening induces short-term distress- breast cancer-specific concern prevails longer. *EUR J CANCER* 2000; 36(9):1089-1097.
- (6) Gram IT, Lund E, Slenker SE. Quality of life following a false positive mammogram. *Br J Cancer* 1990; 62(6):1018-1022.
- (7) Brett J, Austoker J. Women who are recalled for further investigation for breast screening: psychological consequences 3 years after recall and factors affecting re-attendance. *J Public Health* 2001; 23(4):292-300.
- (8) Brett J, Austoker J, Ong G. Do women who undergo further investigation for breast screening suffer adverse psychological consequences? A multi-centre follow-up study comparing different breast screening result groups five months after their last breast screening appointment. *J Public Health* 1998; 20(4):396-403.
- (9) Burman ML, Taplin SH, Herta DF, Elmore JG. Effect of false-positive mammograms on interval breast cancer screening in a health maintenance organization. *Ann Intern Med* 1999; 131(1):1-6.

- (10) Lampic C, Thurfjell E, Sjoden P-O. The influence of a false-positive mammogram on a woman's subsequent behaviour for detecting breast cancer. *EUR J CANCER* 2003; 39(12):1730-1737.
- (11) McCann J, Stockton D, Godward S. Impact of false-positive mammography on subsequent screening attendance and risk of cancer. *Breast Cancer Res* 2002; 4(5):R11.
- (12) Brewer NT, Salz T, Lillie SE. Systematic review: the long-term effects of false-positive mammograms. *Ann Intern Med* 2007; 146(7):502-510.
- (13) NHS Centre for Reviews and Dissemination. Systematic reviews: CRD's guidance for undertaking reviews in health care. York: NHS Centre for Reviews and Dissemination; 2009.
- (14) Deeks JJ, Dinnes J, D'Amico R, Sowden AJ, Sakarovich C, Song F et al. Evaluating non-randomised intervention studies. *Health Technol Assess* 2003; 7(27):iii-173.
- (15) Egger M, Smith GD, Altman DG. Systematic Reviews in Health Care: Meta-analysis in Context. 2nd ed. London: BMJ; 2001.
- (16) Mays N, Pope C. Qualitative Research: Rigour and qualitative research. *BMJ* 1995; 311(6997):109-112.
- (17) Popay J, Rogers A, Williams G. Rationale and standards for the systematic review of qualitative literature in health services research. *Qual Health Res* 1998; 8(3):341-351.
- (18) Moher D, Liberati A, Tetzlaff J, Altman DG. Preferred reporting items for systematic reviews and meta-analyses: the PRISMA statement. *BMJ* 2009; 339.
- (19) Moher D, Schulz KF, Altman DG. The CONSORT statement: revised recommendations for improving the quality of reports of parallel-group randomised trials. *The Lancet* 2001; 357(9263):1191-1194.
- (20) Elm Ev, Altman DG, Egger M, Pocock SJ, Gotsche PC, Vandenbroucke JP. Strengthening the reporting of observational studies in epidemiology (STROBE) statement: guidelines for reporting observational studies. *BMJ* 2007; 335(7624):806-808.

(21) Noblit GW, Hare RD. Meta-ethnography: synthesizing qualitative studies. Newbury Park: Sage; 1988.

(22) Britten N, Campbell R, Pope C, Donovan J, Morgan M, Pill R. Using meta ethnography to synthesise qualitative research: a worked example. *J Health Serv Res Policy* 2002; 7(4):209-215.

(23) Garside R, Britten N, Stein K. The experience of heavy menstrual bleeding: a systematic review and meta-ethnography of qualitative studies. *J Adv Nurs* 2008; 63(6):550-562.

(24) Rodgers M, Sowden A, Pettigrew M, Arai L, Roberts H, Britten N et al. Testing Methodological Guidance on the Conduct of Narrative Synthesis in Systematic Reviews. <http://evi.sagepub.com> [ 2009 [cited 2009 June 12]; 15(1):[49-74]

(25) Oliver S, Harden A, Rees R, Shepherd J, Brunton G, Oakley A. Young people and mental health: novel methods for systematic review of research on barriers and facilitators. *Health Education Research* 2008; 23(5):770-790.

## Appendix 2: Search Strategy

This is the original Medline search strategy by KW. Other search strategies are available from the authors on request.

| Databases, Host Date Searched, Years                                         | Search Strategy<br>Keywords added to Refman                                                                                                                                                                                                                                                                                                                                                                                                                                                                                                                                                                                                                                                                                                                                                                                                                                                                                                                                                                                                                                                                                                                                                 | Number of Results |
|------------------------------------------------------------------------------|---------------------------------------------------------------------------------------------------------------------------------------------------------------------------------------------------------------------------------------------------------------------------------------------------------------------------------------------------------------------------------------------------------------------------------------------------------------------------------------------------------------------------------------------------------------------------------------------------------------------------------------------------------------------------------------------------------------------------------------------------------------------------------------------------------------------------------------------------------------------------------------------------------------------------------------------------------------------------------------------------------------------------------------------------------------------------------------------------------------------------------------------------------------------------------------------|-------------------|
| Medline Ovid<br>Scoping Search<br>1950- current<br>Searched on<br>08/10/2010 | <ol style="list-style-type: none"> <li>1. exp mammography/ae, px</li> <li>2. exp mammography/</li> <li>3. FFDM.tw.</li> <li>4. (mammogram* or mammograph*).tw.</li> <li>5. (breast adj2 screen*).tw.</li> <li>6. (breast adj2 scan*).tw.</li> <li>7. "National Health Service Breast Screening Programme".tw.</li> <li>8. NHSBSP.tw.</li> <li>9. UK breast screen* program*.tw.</li> <li>10. NHS breast screen* program*.tw.</li> <li>11. Mass Screening/</li> <li>12. exp Breast Neoplasms/</li> <li>13. 11 and 12</li> <li>14. 2 or 3 or 4 or 5 or 6 or 7 or 8 or 9 or 10 or 13</li> <li>15. False Positive Reactions/</li> <li>16. (false* adj3 positive*).tw.</li> <li>17. "false-positive".tw.</li> <li>18. "false-positives".tw.</li> <li>19. (false adj3 test*).tw.</li> <li>20. (false adj3 retest*).tw.</li> <li>21. (retest* adj3 negative).tw.</li> <li>22. diagnostic uncertain*.tw.</li> <li>23. or/15-22</li> <li>24. exp Stress, Psychological/</li> <li>25. exp anxiety/</li> <li>26. exp fear/</li> <li>27. exp Depression/</li> <li>28. exp Emotions/</li> <li>29. Psychophysiologic Disorders/</li> <li>30. exp Psychology/</li> <li>31. exp Health Behavior/</li> </ol> | 559               |

|  |                                                                                                                                                                                                                                                                                                                                                                                                                                                                                                                                                                                                                                                                                                                                                                                                                                                                                                                                                                                                                                                                                                                                                                                                                                                                                                                                                                                                                                                                                                                                                                                                                                                                                                                                                             |  |
|--|-------------------------------------------------------------------------------------------------------------------------------------------------------------------------------------------------------------------------------------------------------------------------------------------------------------------------------------------------------------------------------------------------------------------------------------------------------------------------------------------------------------------------------------------------------------------------------------------------------------------------------------------------------------------------------------------------------------------------------------------------------------------------------------------------------------------------------------------------------------------------------------------------------------------------------------------------------------------------------------------------------------------------------------------------------------------------------------------------------------------------------------------------------------------------------------------------------------------------------------------------------------------------------------------------------------------------------------------------------------------------------------------------------------------------------------------------------------------------------------------------------------------------------------------------------------------------------------------------------------------------------------------------------------------------------------------------------------------------------------------------------------|--|
|  | <p>32. exp Behavior/</p> <p>33. exp attitude/</p> <p>34. Motivation/</p> <p>35. Decision Making/</p> <p>36. exp "Quality of Life"/</p> <p>37. Health Knowledge, Attitudes, Practice/ or Attitude to Health/ or Patient Satisfaction/ or Patient Participation/ or Consumer Participation/ or Consumer Satisfaction/ or Sick Role/ or "Patient Acceptance of Health Care"/</p> <p>38. exp Affect/</p> <p>39. exp Affective Symptoms/</p> <p>40. (accept* or adhere* or affect* or anger* or anxiety or anxious or alarm* or attitude* or appetite or behavior* or behaviour* or belief* or believe* or comply or complian* or concordance or coping or concern* or confusion or confused or consequence* or consequential or conflict or cultural*).tw.</p> <p>41. (demotivated or demotivation* or de-motivated or demotivation* or disconcert* or depression or depressed or distress* or deleterious or disappointment or emotion* or ethnic* or ethnol* or experienc* or fear* or fright* or harm* or mental* or mistrust* or mood* or motivated or motivation* or nightmare* or perception* or perceive* or psychological or psychologically or psychology or psychosocial or reattend* or social*).tw.</p> <p>42. "quality of life".tw.</p> <p>43. (relief or relieved or risk*).tw.</p> <p>44. (sleep or stress* or terror or terrified or trust* or mistrust*).tw.</p> <p>45. (worry or worried).tw.</p> <p>46. (wellbeing or "well-being" or "well being").tw.</p> <p>47. or/24-46</p> <p>48. exp Intervention Studies/</p> <p>49. exp Questionnaires/</p> <p>50. psychological tests/ or psychometrics/ or models psychological/</p> <p>51. Patient Education as Topic/</p> <p>52. health education/ or health promotion/ or health knowledge/</p> |  |
|--|-------------------------------------------------------------------------------------------------------------------------------------------------------------------------------------------------------------------------------------------------------------------------------------------------------------------------------------------------------------------------------------------------------------------------------------------------------------------------------------------------------------------------------------------------------------------------------------------------------------------------------------------------------------------------------------------------------------------------------------------------------------------------------------------------------------------------------------------------------------------------------------------------------------------------------------------------------------------------------------------------------------------------------------------------------------------------------------------------------------------------------------------------------------------------------------------------------------------------------------------------------------------------------------------------------------------------------------------------------------------------------------------------------------------------------------------------------------------------------------------------------------------------------------------------------------------------------------------------------------------------------------------------------------------------------------------------------------------------------------------------------------|--|

|  |                                                                                                                                                                                                                                                                                                                                                                                                                                                                                                                                                                                                                                                                                                                                                                                                                                                                                                                                                                                                                                                                                                                                                                                                                                                                                                                                                                                                                                                                                                                                                                                                                                                                                        |  |
|--|----------------------------------------------------------------------------------------------------------------------------------------------------------------------------------------------------------------------------------------------------------------------------------------------------------------------------------------------------------------------------------------------------------------------------------------------------------------------------------------------------------------------------------------------------------------------------------------------------------------------------------------------------------------------------------------------------------------------------------------------------------------------------------------------------------------------------------------------------------------------------------------------------------------------------------------------------------------------------------------------------------------------------------------------------------------------------------------------------------------------------------------------------------------------------------------------------------------------------------------------------------------------------------------------------------------------------------------------------------------------------------------------------------------------------------------------------------------------------------------------------------------------------------------------------------------------------------------------------------------------------------------------------------------------------------------|--|
|  | <p>53. decision aid/ or decision support techniques/<br/> 54. Educational Technology/<br/> 55. audiovisual aids/<br/> 56. telehealth/ or telemedicine/ or telecommunication/<br/> 57. social support/ or self help groups/ or support groups/<br/> 58. exp communication/<br/> 59. persuasive communication/<br/> 60. exp counseling/<br/> 61. interviews as topic/<br/> 62. evaluation studies as topic/<br/> 63. qualitative research/ or program evaluation/ or process evaluation/<br/> 64. focus groups/<br/> 65. nursing methodology research/<br/> 66. intervention*.tw.<br/> 67. (qualitative* or findings or evaluat* or synthes?s or meta-synthesis* or meta synthesis* or metasynthesis or meta-ethnograph* or metaethnograph* or meta ethnograph* or meta-study or metastudy or meta study or systematic* or "technology assessment" or sampl* or study or studies or observation* or research or discourse* or analys?s or humanistic or biographical or biography or narrative*).tw.<br/> 68. (support* or literature or booklet* or leaflet* or pamphlet* or letter* or video* or podcast* or telephon* or transtelephon*).tw.<br/> 69. (questionnaire* or interview* or discuss* or feedback or personalised or personalized or assessment* or reassurance or reassur*).tw.<br/> 70. (counsel* or education* or "informed choice" or "informed choices").tw.<br/> 71. "in person".tw.<br/> 72. (peer* adj5 (support* or group*)).tw.<br/> 73. ("expert patients" or "expert patients").tw.<br/> 74. (social adj network*).tw.<br/> 75. "emotional support".tw.<br/> 76. "family support".tw.<br/> 77. focus group*.tw.<br/> 78. ("one to one" or "one on one").tw.</p> |  |
|--|----------------------------------------------------------------------------------------------------------------------------------------------------------------------------------------------------------------------------------------------------------------------------------------------------------------------------------------------------------------------------------------------------------------------------------------------------------------------------------------------------------------------------------------------------------------------------------------------------------------------------------------------------------------------------------------------------------------------------------------------------------------------------------------------------------------------------------------------------------------------------------------------------------------------------------------------------------------------------------------------------------------------------------------------------------------------------------------------------------------------------------------------------------------------------------------------------------------------------------------------------------------------------------------------------------------------------------------------------------------------------------------------------------------------------------------------------------------------------------------------------------------------------------------------------------------------------------------------------------------------------------------------------------------------------------------|--|

|  |                                                                                                                                                                                                                                                                                                                                                                                                                                                                                                                                                                                                                                                                                                                                                                                                                                                                                                                                                                                                                                                                                                                                                                                                                                                                                                                                                                                                                                                                                                                                                                                                                                                                                                                                                                                                                                                      |  |
|--|------------------------------------------------------------------------------------------------------------------------------------------------------------------------------------------------------------------------------------------------------------------------------------------------------------------------------------------------------------------------------------------------------------------------------------------------------------------------------------------------------------------------------------------------------------------------------------------------------------------------------------------------------------------------------------------------------------------------------------------------------------------------------------------------------------------------------------------------------------------------------------------------------------------------------------------------------------------------------------------------------------------------------------------------------------------------------------------------------------------------------------------------------------------------------------------------------------------------------------------------------------------------------------------------------------------------------------------------------------------------------------------------------------------------------------------------------------------------------------------------------------------------------------------------------------------------------------------------------------------------------------------------------------------------------------------------------------------------------------------------------------------------------------------------------------------------------------------------------|--|
|  | <p>79. ((patient* or consumer* or recipient* or client* or individual*) adj5 (communicat* or counsel* or inform* or education* or choice or discuss* or decision* or decide* or participat* or preference* or navigat*)).tw.</p> <p>80. ((patient* or consumer* or recipient* or client* or individual*) adj5 (tailor* or personal*)).tw.</p> <p>81. ((personal or interpersonal* or individual*) adj5 (decision* or choice* or preference* or participat* or preference*)).tw.</p> <p>82. ((tailor* or individual* or personal*) adj5 message*).tw.</p> <p>83. ((allocat* or allot* or assign* or divid*) adj5 (condition* or experiment* or intervention* or treatment* or therap* or control* or group*)).tw.</p> <p>84. or/48-83</p> <p>85. 1 and 23 and 84</p> <p>86. 14 and 23 and 47 and 84</p> <p>87. 85 or 86</p> <p>88. 1 and 23</p> <p>89. 14 and 23 and 47</p> <p>90. 88 or 89</p> <p>91. limit 90 to ("qualitative studies (sensitivity)" or "qualitative studies (specificity)" or "qualitative studies (optimized)")</p> <p>92. limit 90 to systematic reviews</p> <p>93. limit 90 to (case reports or clinical trial, all or clinical trial or comparative study or controlled clinical trial or evaluation studies or government publications or guideline or meta analysis or multicenter study or patient education handout or practice guideline or randomized controlled trial or "review" or "scientific integrity review" or technical report or twin study or validation studies)</p> <p>94. 87 or 91 or 92 or 93</p> <p>95. 51 or 52 or 53 or 54 or 55 or 56 or 57 or 58 or 59 or 60 or 64 or 68 or 69 or 70 or 71 or 72 or 73 or 74 or 75 or 76 or 77 or 78 or 79 or 80 or 81 or 82 or 83</p> <p>96. 48 or 49 or 61 or 62 or 63 or 65 or 66 or 67</p> <p>97. 14 and 23 and 47 and 95 and 96</p> <p>98. 1 and 23 and 96</p> |  |
|--|------------------------------------------------------------------------------------------------------------------------------------------------------------------------------------------------------------------------------------------------------------------------------------------------------------------------------------------------------------------------------------------------------------------------------------------------------------------------------------------------------------------------------------------------------------------------------------------------------------------------------------------------------------------------------------------------------------------------------------------------------------------------------------------------------------------------------------------------------------------------------------------------------------------------------------------------------------------------------------------------------------------------------------------------------------------------------------------------------------------------------------------------------------------------------------------------------------------------------------------------------------------------------------------------------------------------------------------------------------------------------------------------------------------------------------------------------------------------------------------------------------------------------------------------------------------------------------------------------------------------------------------------------------------------------------------------------------------------------------------------------------------------------------------------------------------------------------------------------|--|

|  |                                                                            |  |
|--|----------------------------------------------------------------------------|--|
|  | 99. 14 and 23 and 47 and 96<br>100. 94 or 97 or 98 or 99<br>101. 94 or 100 |  |
|--|----------------------------------------------------------------------------|--|



## Appendix 3: Study flow chart

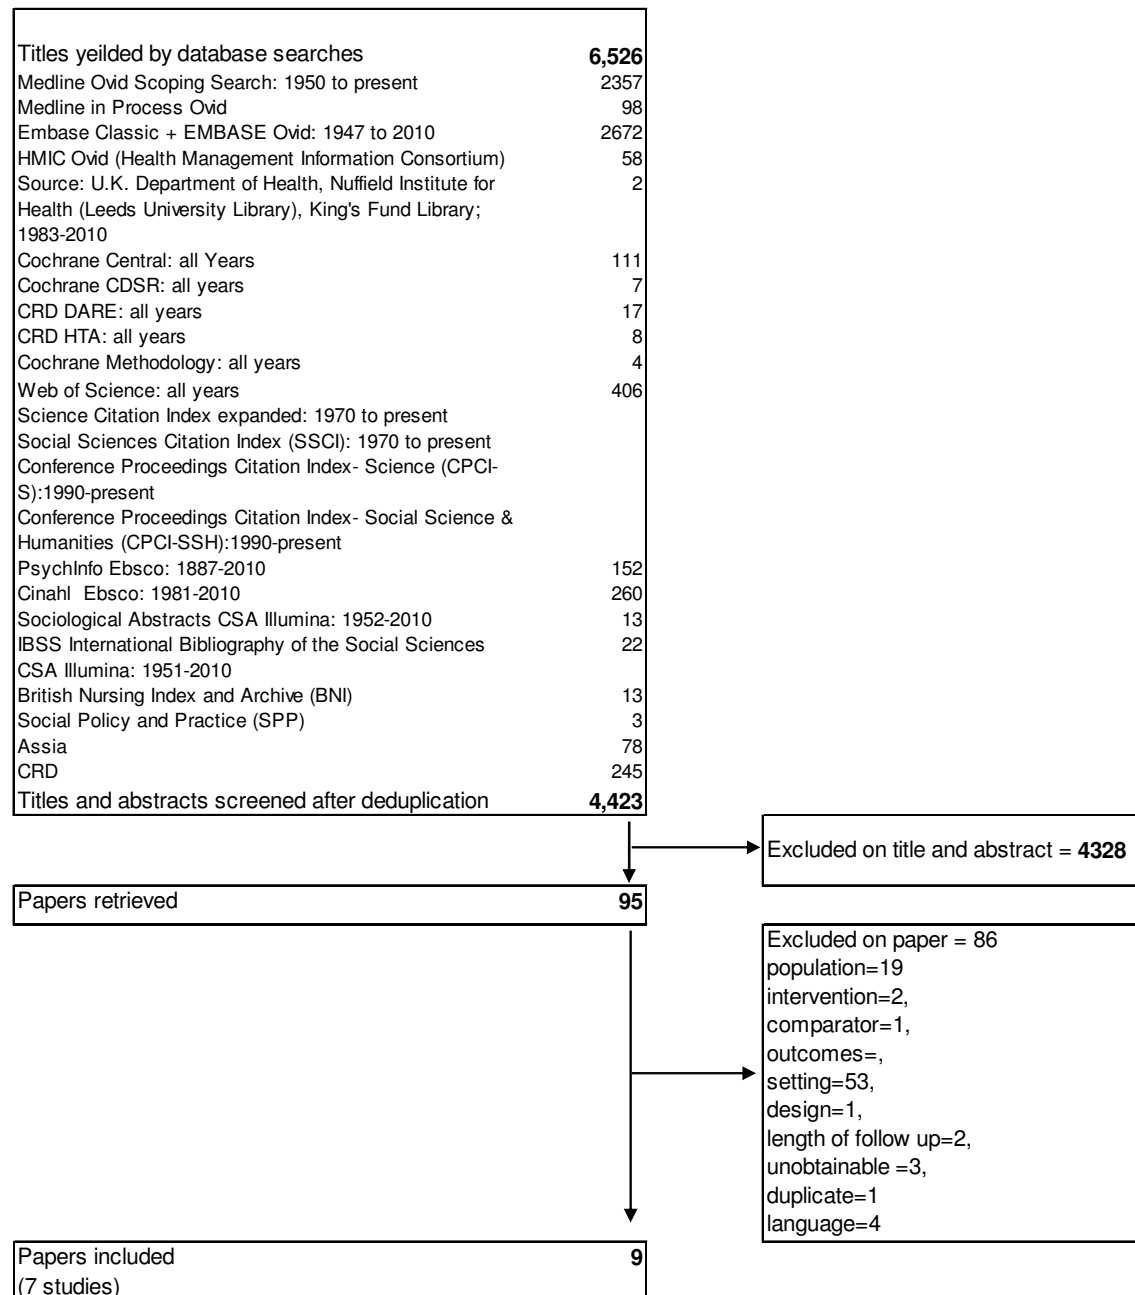

# Appendix 4:Critical appraisal of included studies

| STROBE Statement—checklist of items that should be included in reports of observational studies                                                                                                 |                                       |                                                                                                                                                                                      |    |    |    |    |    |    |    |    |
|-------------------------------------------------------------------------------------------------------------------------------------------------------------------------------------------------|---------------------------------------|--------------------------------------------------------------------------------------------------------------------------------------------------------------------------------------|----|----|----|----|----|----|----|----|
|                                                                                                                                                                                                 | Item No                               | Recommendation                                                                                                                                                                       | 1  | 2  | 3  | 4  | 5  | 6  | 7  | 8  |
| Title and abstract                                                                                                                                                                              | 1                                     | (a) Indicate the study's design with a commonly used term in the title or the abstract                                                                                               | X  | X  | X  | X  | X  | X  | X  | X  |
|                                                                                                                                                                                                 |                                       | (b) Provide in the abstract an informative and balanced summary of what was done and what was found                                                                                  | ✓  | ✓  | ✓  | ✓  | ✓  | ✓  | ✓  | ✓  |
| Introduction                                                                                                                                                                                    |                                       |                                                                                                                                                                                      |    |    |    |    |    |    |    |    |
| Background/rationale                                                                                                                                                                            | 2                                     | Explain the scientific background and rationale for the investigation being reported                                                                                                 | ✓  | ✓  | ✓  | ✓  | ✓  | ✓  | ✓  | ✓  |
| Objectives                                                                                                                                                                                      | 3                                     | State specific objectives, including any prespecified hypotheses                                                                                                                     | ✓  | ✓  | ✓  | ✓  | ✓  | ✓  | ✓  | ✓  |
| Methods                                                                                                                                                                                         |                                       |                                                                                                                                                                                      |    |    |    |    |    |    |    |    |
| Study design                                                                                                                                                                                    | 4                                     | Present key elements of study design early in the paper                                                                                                                              | ✓  | ✓  | ✓  | ✓  | ✓  | ✓  | ✓  | ✓  |
| Setting                                                                                                                                                                                         | 5                                     | Describe the setting, locations, and relevant dates, including periods of recruitment, exposure, follow-up, and data collection                                                      | ✓  | ✓  | ✓  | P  | ✓  | ✓  | P  | ✓  |
| Participants                                                                                                                                                                                    | 6                                     | (a) Cohort study—Give the eligibility criteria, and the sources and methods of selection of participants. Describe methods of follow-up                                              | ✓  | ✓  | ✓  | ✓  | ✓  | ✓  | ✓  | ✓  |
|                                                                                                                                                                                                 |                                       | Case-control study—Give the eligibility criteria, and the sources and methods of case ascertainment and control selection. Give the rationale for the choice of cases and controls   | NA |
|                                                                                                                                                                                                 |                                       | Cross-sectional study—Give the eligibility criteria, and the sources and methods of selection of participants                                                                        | NA |
|                                                                                                                                                                                                 |                                       | (b) Cohort study—For matched studies, give matching criteria and number of exposed and unexposed                                                                                     | NA |
|                                                                                                                                                                                                 |                                       | Case-control study—For matched studies, give matching criteria and the number of controls per case                                                                                   | NA |
| Variables                                                                                                                                                                                       | 7                                     | Clearly define all outcomes, exposures, predictors, potential confounders, and effect modifiers. Give diagnostic criteria, if applicable                                             | ✓  | ✓  | ✓  | P  | P  | ✓  | ✓  | ✓  |
| Data sources/measurement                                                                                                                                                                        | 8*                                    | For each variable of interest, give sources of data and details of methods of assessment (measurement). Describe comparability of assessment methods if there is more than one group | ✓  | ✓  | ✓  | ✓  | ✓  | ✓  | ✓  | ✓  |
| Bias                                                                                                                                                                                            | 9                                     | Describe any efforts to address potential sources of bias                                                                                                                            | ✓  | X  | ✓  | X  | X  | X  | X  | X  |
| Study size                                                                                                                                                                                      | 10                                    | Explain how the study size was arrived at                                                                                                                                            | ✓  | ✓  | ✓  | ✓  | X  | NA | NA | X  |
| Quantitative variables                                                                                                                                                                          | 11                                    | Explain how quantitative variables were handled in the analyses. If applicable, describe which groupings were chosen and why                                                         | ✓  | ✓  | ✓  | ✓  | ✓  | X  | X  | ✓  |
| Statistical methods                                                                                                                                                                             | 12                                    | (a) Describe all statistical methods, including those used to control for confounding                                                                                                | ✓  | ✓  | ✓  | ✓  | ✓  | X  | X  | ✓  |
|                                                                                                                                                                                                 |                                       | (b) Describe any methods used to examine subgroups and interactions                                                                                                                  | NA | NA | ✓  | NA | NA | X  | NA | NA |
|                                                                                                                                                                                                 |                                       | (c) Explain how missing data were addressed                                                                                                                                          | X  | X  | ✓  | X  | X  | NA | NA | X  |
|                                                                                                                                                                                                 |                                       | (d) Cohort study—If applicable, explain how loss to follow-up was addressed                                                                                                          | X  | X  | NA | X  | X  | NA | NA | NA |
|                                                                                                                                                                                                 |                                       | Case-control study—If applicable, explain how matching of cases and controls was addressed                                                                                           | NA |
|                                                                                                                                                                                                 |                                       | Cross-sectional study—If applicable, describe analytical methods taking account of sampling strategy                                                                                 | NA | X  |
|                                                                                                                                                                                                 | (e) Describe any sensitivity analyses | NA                                                                                                                                                                                   | NA | NA | NA | NA | NA | NA | NA |    |
| 1: Brett & Austoker (2001), 2:Brett et al. (1998), 3:Ong et al. (1997)a, 4:Bull & Campbell (1991), 5: Ellman et al. (1989), 6:McCann et al. (2002), 7:O'Sullivan (2001), 8:Orton et al. (1991). |                                       |                                                                                                                                                                                      |    |    |    |    |    |    |    |    |
| ✓: item present, X:item absent, P:item partially present, F: results only present as figures, NA: not applicable                                                                                |                                       |                                                                                                                                                                                      |    |    |    |    |    |    |    |    |

1: Brett & Austoker (2001), 2:Brett et al. (1998), 3:Ong et al. (1997)a, 4:Bull & Campbell (1991), 5: Ellman et al. (1989), 6:McCann et al. (2002), 7:O'Sullivan (2001), 8:Orton et al. (1991).

✓: item present, X: item absent, P: item partially present, F: results only present as figures, NA: not applicable

| Results                  |     | 1                                                                                                                                                                                                            | 2  | 3  | 5  | 6  | 9  | 10 | 11 |
|--------------------------|-----|--------------------------------------------------------------------------------------------------------------------------------------------------------------------------------------------------------------|----|----|----|----|----|----|----|
| Participants             | 13* | (a) Report numbers of individuals at each stage of study—eg numbers potentially eligible, examined for eligibility, confirmed eligible, included in the study, completing follow-up, and analysed            | ✓  | ✓  | ✓  | P  | ✓  | ✓  | ✓  |
|                          |     | (b) Give reasons for non-participation at each stage                                                                                                                                                         | ✓  | ✗  | NA | ✗  | ✗  | NA | ✗  |
|                          |     | (c) Consider use of a flow diagram                                                                                                                                                                           | ✗  | ✗  | NA | ✗  | ✗  | ✗  | ✗  |
| Descriptive data         | 14* | (a) Give characteristics of study participants (eg demographic, clinical, social) and information on exposures and potential confounders                                                                     | ✓  | ✗  | P  | P  | P  | ✗  | ✗  |
|                          |     | (b) Indicate number of participants with missing data for each variable of interest                                                                                                                          | ✗  | ✗  | ✓  | ✗  | ✗  | NA | ✗  |
|                          |     | (c) <i>Cohort study</i> —Summarise follow-up time (eg, average and total amount)                                                                                                                             | ✓  | ✓  | NA | ✗  | ✗  | NA | NA |
| Outcome data             | 15* | <i>Cohort study</i> —Report numbers of outcome events or summary measures over time                                                                                                                          | ✓  | ✓  | NA | ✓  | ✓  | ✓  | NA |
|                          |     | <i>Case-control study</i> —Report numbers in each exposure category, or summary measures of exposure                                                                                                         | NA |
|                          |     | <i>Cross-sectional study</i> —Report numbers of outcome events or summary measures                                                                                                                           | NA | NA | ✓  | NA | NA | NA | ✓  |
| Main results             | 16  | (a) Give unadjusted estimates and, if applicable, confounder-adjusted estimates and their precision (eg, 95% confidence interval). Make clear which confounders were adjusted for and why they were included | ✓  | ✓  | ✓  | ✓  | ✓  | ✓  | P  |
|                          |     | (b) Report category boundaries when continuous variables were categorized                                                                                                                                    | NA | NA | NA | ✓  | ✓  | NA | NA |
|                          |     | (c) If relevant, consider translating estimates of relative risk into absolute risk for a meaningful time period                                                                                             | ✗  | ✗  | NA | NA | NA | NA | NA |
| Other analyses           | 17  | Report other analyses done—eg analyses of subgroups and interactions, and sensitivity analyses                                                                                                               | NA | ✓  | ✓  | NA | NA | NA | NA |
| <b>Discussion</b>        |     |                                                                                                                                                                                                              |    |    |    |    |    |    |    |
| Key results              | 18  | Summarise key results with reference to study objectives                                                                                                                                                     | ✓  | ✓  | ✓  | ✓  | ✓  | ✓  | ✓  |
| Limitations              | 19  | Discuss limitations of the study, taking into account sources of potential bias or imprecision. Discuss both direction and magnitude of any potential bias                                                   | ✗  | ✓  | ✗  | ✗  | ✗  | ✗  | ✗  |
| Interpretation           | 20  | Give a cautious overall interpretation of results considering objectives, limitations, multiplicity of analyses, results from similar studies, and other relevant evidence                                   | ✓  | ✓  | P  | ✓  | P  | ✓  | ✓  |
| Generalisability         | 21  | Discuss the generalisability (external validity) of the study results                                                                                                                                        | ✗  | ✗  | ✗  | ✗  | ✗  | ✗  | ✓  |
| <b>Other information</b> |     |                                                                                                                                                                                                              |    |    |    |    |    |    |    |
| Funding                  | 22  | Give the source of funding and the role of the funders for the present study and, if applicable, for the original study on which the present article is based                                                | ✓  | ✓  | ✓  | ✗  | ✓  | ✓  | ✗  |

1: Brett & Austoker (2001), 2:Brett et al. (1998), 3:Ong et al. (1997)a, 4:Bull & Campbell (1991), 5: Ellman et al. (1989),6:McCann et al. (2002), 7:O'Sullivan (2001), 8:Orton et al. (1991). ✓: item present, ✗: item absent, P: item partially present, F: results only presented as Figures, NA: not applicable

✓ item present  
✗ item absent  
P item partially present  
F results only presented as Figures  
NA not applicable

| Meldrum et al. 1994. CONSORT statement               |         |              |                                                                                                                                                                                             |
|------------------------------------------------------|---------|--------------|---------------------------------------------------------------------------------------------------------------------------------------------------------------------------------------------|
| Section/Topic                                        | Item No | Compliant    | Checklist item                                                                                                                                                                              |
| <b>Title and abstract</b>                            |         |              |                                                                                                                                                                                             |
|                                                      | 1a      | Yes          | Identification as a randomised trial in the title                                                                                                                                           |
|                                                      | 1b      | Yes          | Structured summary of trial design, methods, results, and conclusions (for specific guidance see CONSORT for abstracts)                                                                     |
| <b>Introduction</b>                                  |         |              |                                                                                                                                                                                             |
| Background and objectives                            | 2a      | Yes          | Scientific background and explanation of rationale                                                                                                                                          |
|                                                      | 2b      | Yes          | Specific objectives or hypotheses                                                                                                                                                           |
| <b>Methods</b>                                       |         |              |                                                                                                                                                                                             |
| Trial design                                         | 3a      | Not reported | Description of trial design (such as parallel, factorial) including allocation ratio                                                                                                        |
|                                                      | 3b      | NA           | Important changes to methods after trial commencement (such as eligibility criteria), with reasons                                                                                          |
| Participants                                         | 4a      | Yes          | Eligibility criteria for participants                                                                                                                                                       |
|                                                      | 4b      | Yes          | Settings and locations where the data were collected                                                                                                                                        |
| Interventions                                        | 5       | No           | The interventions for each group with sufficient details to allow replication, including how and when they were actually administered                                                       |
| Outcomes                                             | 6a      | Yes          | Completely defined pre-specified primary and secondary outcome measures, including how and when they were assessed                                                                          |
|                                                      | 6b      | NA           | Any changes to trial outcomes after the trial commenced, with reasons                                                                                                                       |
| Sample size                                          | 7a      | Yes          | How sample size was determined                                                                                                                                                              |
|                                                      | 7b      | NA           | When applicable, explanation of any interim analyses and stopping guidelines                                                                                                                |
| <b>Randomisation:</b>                                |         |              |                                                                                                                                                                                             |
| Sequence generation                                  | 8a      | Yes          | Method used to generate the random allocation sequence                                                                                                                                      |
|                                                      | 8b      | Not reported | Type of randomisation; details of any restriction (such as blocking and block size)                                                                                                         |
| Allocation concealment mechanism                     | 9       | Not reported | Mechanism used to implement the random allocation sequence (such as sequentially numbered containers), describing any steps taken to conceal the sequence until interventions were assigned |
| Implementation                                       | 10      | Not reported | Who generated the random allocation sequence, who enrolled participants, and who assigned participants to interventions                                                                     |
| Blinding                                             | 11a     | Not reported | If done, who was blinded after assignment to interventions (for example, participants, care providers, those assessing outcomes) and how                                                    |
|                                                      | 11b     | Yes          | If relevant, description of the similarity of interventions                                                                                                                                 |
| Statistical methods                                  | 12a     | Yes          | Statistical methods used to compare groups for primary and secondary outcomes                                                                                                               |
|                                                      | 12b     | Yes          | Methods for additional analyses, such as subgroup analyses and adjusted analyses                                                                                                            |
| <b>Results</b>                                       |         |              |                                                                                                                                                                                             |
| Participant flow (a diagram is strongly recommended) | 13a     | Yes          | For each group, the numbers of participants who were randomly assigned, received intended treatment, and were analysed for the primary outcome                                              |
|                                                      | 13b     | No           | For each group, losses and exclusions after randomisation, together with reasons                                                                                                            |
| Recruitment                                          | 14a     | Yes          | Dates defining the periods of recruitment and follow-up                                                                                                                                     |
|                                                      | 14b     | NA           | Why the trial ended or was stopped                                                                                                                                                          |
| Baseline data                                        | 15      | F            | A table showing baseline demographic and clinical characteristics for each group                                                                                                            |
| Numbers analysed                                     | 16      | Yes          | For each group, number of participants (denominator) included in each analysis and whether the analysis was by original assigned groups                                                     |
| Outcomes and estimation                              | 17a     | Yes          | For each primary and secondary outcome, results for each group, and the estimated effect size and its precision (such as 95% confidence interval)                                           |
|                                                      | 17b     | NA           | For binary outcomes, presentation of both absolute and relative effect sizes is recommended                                                                                                 |
| Ancillary analyses                                   | 18      | NA           | Results of any other analyses performed, including subgroup analyses and adjusted analyses, distinguishing pre-specified from exploratory                                                   |
| Harms                                                | 19      | Not reported | All important harms or unintended effects in each group (for specific guidance see CONSORT for harms)                                                                                       |
| <b>Discussion</b>                                    |         |              |                                                                                                                                                                                             |
| Limitations                                          | 20      | Not reported | Trial limitations, addressing sources of potential bias, imprecision, and, if relevant, multiplicity of analyses                                                                            |
| Generalisability                                     | 21      | Not reported | Generalisability (external validity, applicability) of the trial findings                                                                                                                   |
| Interpretation                                       | 22      | No           | Interpretation consistent with results, balancing benefits and harms, and considering other relevant evidence                                                                               |
| <b>Other information</b>                             |         |              |                                                                                                                                                                                             |
| Registration                                         | 23      | Pre-registry | Registration number and name of trial registry                                                                                                                                              |
| Protocol                                             | 24      | No           | Where the full trial protocol can be accessed, if available                                                                                                                                 |
| Funding                                              | 25      | Yes          | Sources of funding and other support (such as supply of drugs), role of funders                                                                                                             |
